# Supplementary material for: Anti-Inflammatory Dysidazirine Carboxylic Acid from the Marine Cyanobacterium Caldora sp. Collected from the Reefs of Fort Lauderdale, Florida
Source: Molecules. 2022 Mar 6;27(5):1717. doi: 10.3390/molecules27051717 (PMC8911782; doi:10.3390/molecules27051717)
Supplement: Supplementary file 1 [file molecules-27-01717-s001.zip › molecules-1539671-supplementary.pdf]

# Anti-inflammatory dysidazirine carboxylic acid from the marine cyanobacterium

*Caldora* sp. collected from the reefs of Fort Lauderdale, Florida#

Sarath P. Gunasekera<sup>1</sup>, Sofia Kokkaliari<sup>2</sup>, Ranjala Ratnayake<sup>2</sup>, Thomas Sauvage<sup>1</sup>, Larissa A. H. dos Santos<sup>1</sup>, Hendrik Luesch<sup>2</sup> and Valerie J. Paul<sup>1\*</sup>

<sup>1</sup> Smithsonian Marine Station at Ft. Pierce, 701 Seaway Drive, Ft. Pierce, FL 34949, USA

<sup>2</sup> Department of Medicinal Chemistry and Center for Natural Products, Drug Discovery and Development (CNPd3), University of Florida, 1345 Center Drive, Gainesville, Florida 32610, USA

<sup>3</sup> Instituto de Biociencias, Universidade Federal do Rio Grande do Sul, Porto Alegre, RS, 90650, Brazil

\* To whom correspondence should be addressed. E-mail: paul@si.edu

# Dedicated to Dr. William Fenical, University of California San Diego, for his pioneering work on bioactive natural products.

## Contents

|                                                                                                         | Page # |
|---------------------------------------------------------------------------------------------------------|--------|
| <sup>1</sup> H NMR (600 MHz, CD <sub>3</sub> OD) spectrum of dysidazirine carboxylic acid ( <b>1</b> )  | S 2    |
| <sup>13</sup> C NMR (150 MHz, CD <sub>3</sub> OD) spectrum of dysidazirine carboxylic acid ( <b>1</b> ) | S 3    |
| COSY (600 MHz, CD <sub>3</sub> OD) spectrum of dysidazirine carboxylic acid ( <b>1</b> )                | S 4    |
| Edited HSQC (600 MHz, CD <sub>3</sub> OD) spectrum of dysidazirine carboxylic acid ( <b>1</b> )         | S 5    |
| HMBC (600 MHz, CD <sub>3</sub> OD) spectrum of dysidazirine carboxylic acid ( <b>1</b> )                | S 6    |
| JH NMR (600 MHz, CDCl <sub>3</sub> and CD <sub>3</sub> OD) spectrum of dysidazirine ( <b>2</b> )        | S 7    |
| <sup>13</sup> C NMR (150 MHz, CDCl <sub>3</sub> ) spectrum of dysidazirine ( <b>2</b> )                 | S 8    |
| Fully developed 16S rDNA maximum likelihood tree for <i>Caldora</i> spp.                                | S 9    |

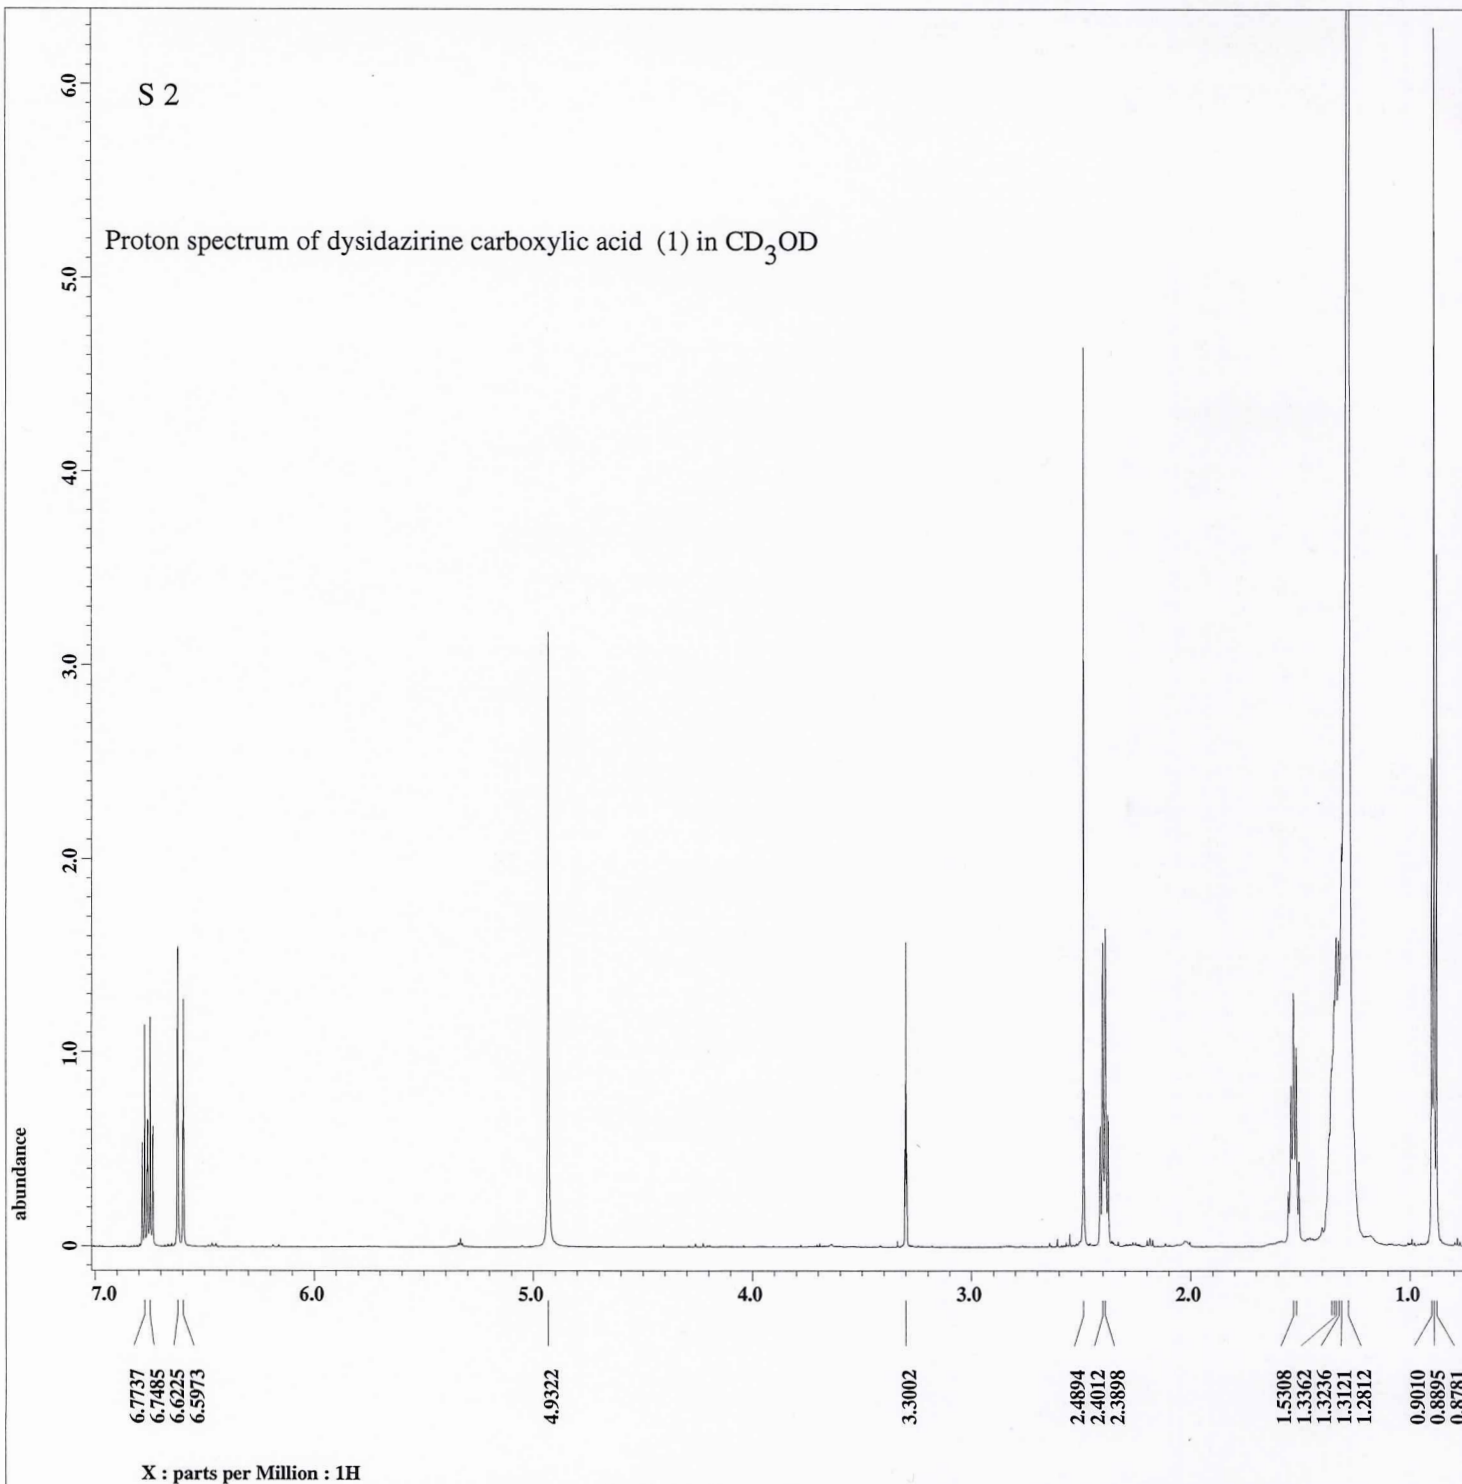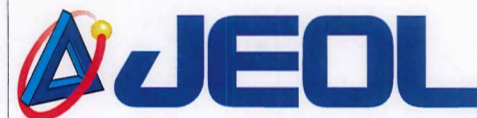

---- PROCESSING PARAMETERS ----  
 dc balance : 0 : FALSE  
 sexp : 0.2[Hz] : 0.0[s]  
 trapezoid3 : 0[%] : 80[%] : 100[%]  
 zerofill : 1  
 fft : 1 : TRUE : TRUE  
 machinephase  
 ppm

Filename = 6sg73-9-single\_pulse-  
 Author = Smithsonian  
 Experiment = single\_pulse.ex2  
 Sample\_id = 6sg73-9  
 Solvent = METHANOL-D3  
 Creation\_time = 19-APR-2018 07:22:43  
 Revision\_time = 24-AUG-2021 14:13:22  
 Current\_time = 24-AUG-2021 14:14:30

Comment = single pulse  
 Data\_format = 1D COMPLEX  
 Dim\_size = 13107  
 Dim\_title = 1H  
 Dim\_units = [ppm]  
 Dimensions = X  
 Site = ECA 600  
 Spectrometer = ECA600-AID

Field\_strength = 14.09636928[T] (600[M  
 X\_acq\_duration = 1.4548992[s]  
 X\_domain = 1H  
 X\_freq = 600.1723046[MHz]  
 X\_offset = 5[ppm]  
 X\_points = 16384  
 X\_prescans = 1  
 X\_resolution = 0.68733284[Hz]  
 X\_sweep = 11.26126126[kHz]  
 Irr\_domain = 1H  
 Irr\_freq = 600.1723046[MHz]  
 Irr\_offset = 5[ppm]  
 Tri\_domain = 1H  
 Tri\_freq = 600.1723046[MHz]  
 Tri\_offset = 5[ppm]  
 Clipped = FALSE  
 Mod\_return = 1  
 Scans = 8  
 Total\_scans = 8

X\_90\_width = 7.9[us]  
 X\_acq\_time = 1.4548992[s]  
 X\_angle = 45[deg]  
 X\_atn = 3[db]  
 X\_pulse = 3.95[us]  
 Irr\_mode = Off  
 Tri\_mode = Off  
 Dante\_preset = FALSE  
 Initial\_wait = 1[s]  
 Recvr\_gain = 34  
 Relaxation\_delay = 5[s]  
 Repetition\_time = 6.4548992[s]  
 Temp\_get = 22.4[dC]

S 3

Carbon spectrum of dysidazine carboxylic acid (1) in CD<sub>3</sub>OD

abundance

176.2128

158.4898  
157.1589

114.1107

49.1458  
49.0022  
48.8586

33.0794  
30.8006  
30.7718  
30.6665  
30.4846  
30.3027  
23.7344  
14.4660

X : parts per Million : 13C

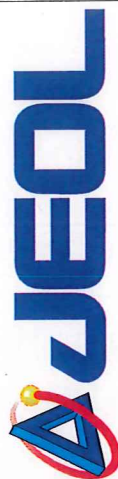

----- PROCESSING PARAMETERS -----

dc\_balance : 0 : FALSE  
semp : 2.0 [Hz] : 0.0 [s]  
trapezoid3 : 0 [%] : 80 [%] : 100 [%]  
zerofill : 1  
fft : 1 : TRUE : TRUE  
machinephase  
ppm

Filename = 6sg73-9-single\_pulse\_  
Author = Smithsonian  
Experiment = single\_pulse\_dec  
Sample\_id = 6sg73-9  
Solvent = METHANOL-D3  
Creation\_time = 19-APR-2018 07:40:49  
Revision\_time = 20-DEC-2021 10:08:27  
Current\_time = 20-DEC-2021 10:10:07  
Comment = single pulse decouple  
Data\_format = 1D COMPLEX  
Dim\_size = 26214  
Dim\_title = 13C  
Dim\_units = [ppm]  
Dimensions = X  
Site = ECA 600  
Spectrometer = ECA600-AID  
Field\_strength = 14.09636928 [T] (600 [M  
X\_acq\_duration = 0.69206016 [s]  
X\_domain = 13C  
X\_freq = 150.91343039 [MHz]  
X\_offset = 100 [ppm]  
X\_points = 32768  
X\_prescans = 4  
X\_resolution = 1.44496109 [Hz]  
X\_sweep = 47.34848485 [kHz]  
X\_domain = 1H  
Irr\_domain = 600.1723046 [MHz]  
Irr\_freq = 5 [ppm]  
Irr\_offset = FALSE  
Clipped = 1  
Mod\_return = 322  
Scans = 322  
Total\_scans = 322  
X\_90\_width = 14.7 [us]  
X\_acq\_time = 0.69206016 [s]  
X\_angle = 30 [deg]  
X\_atn = 2 [dB]  
X\_pulse = 4.9 [us]  
Irr\_atn\_dec = 22.6 [dB]  
Irr\_atn\_noe = 22.6 [dB]  
Irr\_noise = WAITZ  
Decoupling = TRUE  
Initial\_wait = 1 [s]  
Noe = TRUE  
Noe\_time = 2 [s]  
Recvr\_gain = 60  
Relaxation\_delay = 2 [s]  
Repetition\_time = 2.69206016 [s]  
Temp\_get = 22.2 [dC]

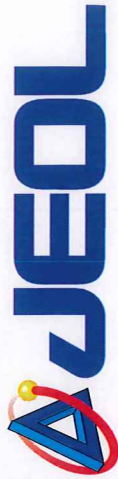

----- PROCESSING PARAMETERS -----

sinbell auto  
fft : 1 : TRUE : TRUE  
ppm  
[transpose]  
zerofill : 4  
sinbell auto  
fft : 1 : TRUE : TRUE  
ppm  
abs  
thresh : 2[%] : 1  
symmetrize : Cosy : 24  
[transpose]

Filename = 6sg73-9-dqf\_cosy\_pfg-  
Author = Smithsonian  
Experiment = dqf cosy\_pfg.ex2  
Sample\_id = 6sg48-10  
Solvent = METHANOL-D3  
Creation\_time = 27-MAR-2018 23:01:24  
Revision\_time = 24-AUG-2021 15:05:41  
Current\_time = 24-AUG-2021 15:06:38  
Comment = Gradient absolute val  
Data\_format = 2D REAL REAL  
Dim\_size = 1024, 1024  
Dim\_title = 1H 1H  
Dim\_units = [ppm] [ppm]  
Dimensions = X Y  
Site = ECA 600  
Spectrometer = ECA600-AID  
Field\_strength = 14.09636928[T] (600[M  
X\_acq\_duration = 0.2276352[s]  
X\_domain = 1H  
X\_freq = 600.1723046 [MHz]  
X\_offset = 3.66988 [ppm]  
X\_points = 1280  
X\_prescans = 4  
X\_resolution = 4.3929937 [Hz]  
X\_sweep = 5.62303194 [kHz]  
Y\_domain = 1H  
Y\_freq = 600.1723046 [MHz]  
Y\_offset = 3.66988 [ppm]  
Y\_points = 256  
Y\_prescans = 0  
Y\_resolution = 17.56723332 [Hz]  
Y\_sweep = 4.49721173 [kHz]  
Irr\_domain = 1H  
Irr\_freq = 600.1723046 [MHz]  
Irr\_offset = 5 [ppm]  
Tri\_domain = 1H  
Tri\_freq = 600.1723046 [MHz]  
Tri\_offset = 5 [ppm]  
Clipped = FALSE  
Mod\_return = 1  
Scans = 4  
Total\_scans = 1024  
X\_acq\_time = 0.2276352 [s]  
X\_atn = 3 [dB]  
X\_pulse = 7.9 [us]  
Y\_acq\_time = 56.92416 [ms]  
Y\_atn = Off  
Irr\_mode = Off  
Tri\_mode = Off  
Dante\_presat = FALSE  
Grad\_1 = 1 [ms]  
Grad\_1\_amp = 60 [mT/m]

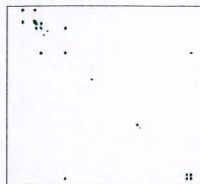

S 4

COSY spectrum of dysidazirine carboxylic acid (1) in CD<sub>3</sub>OD

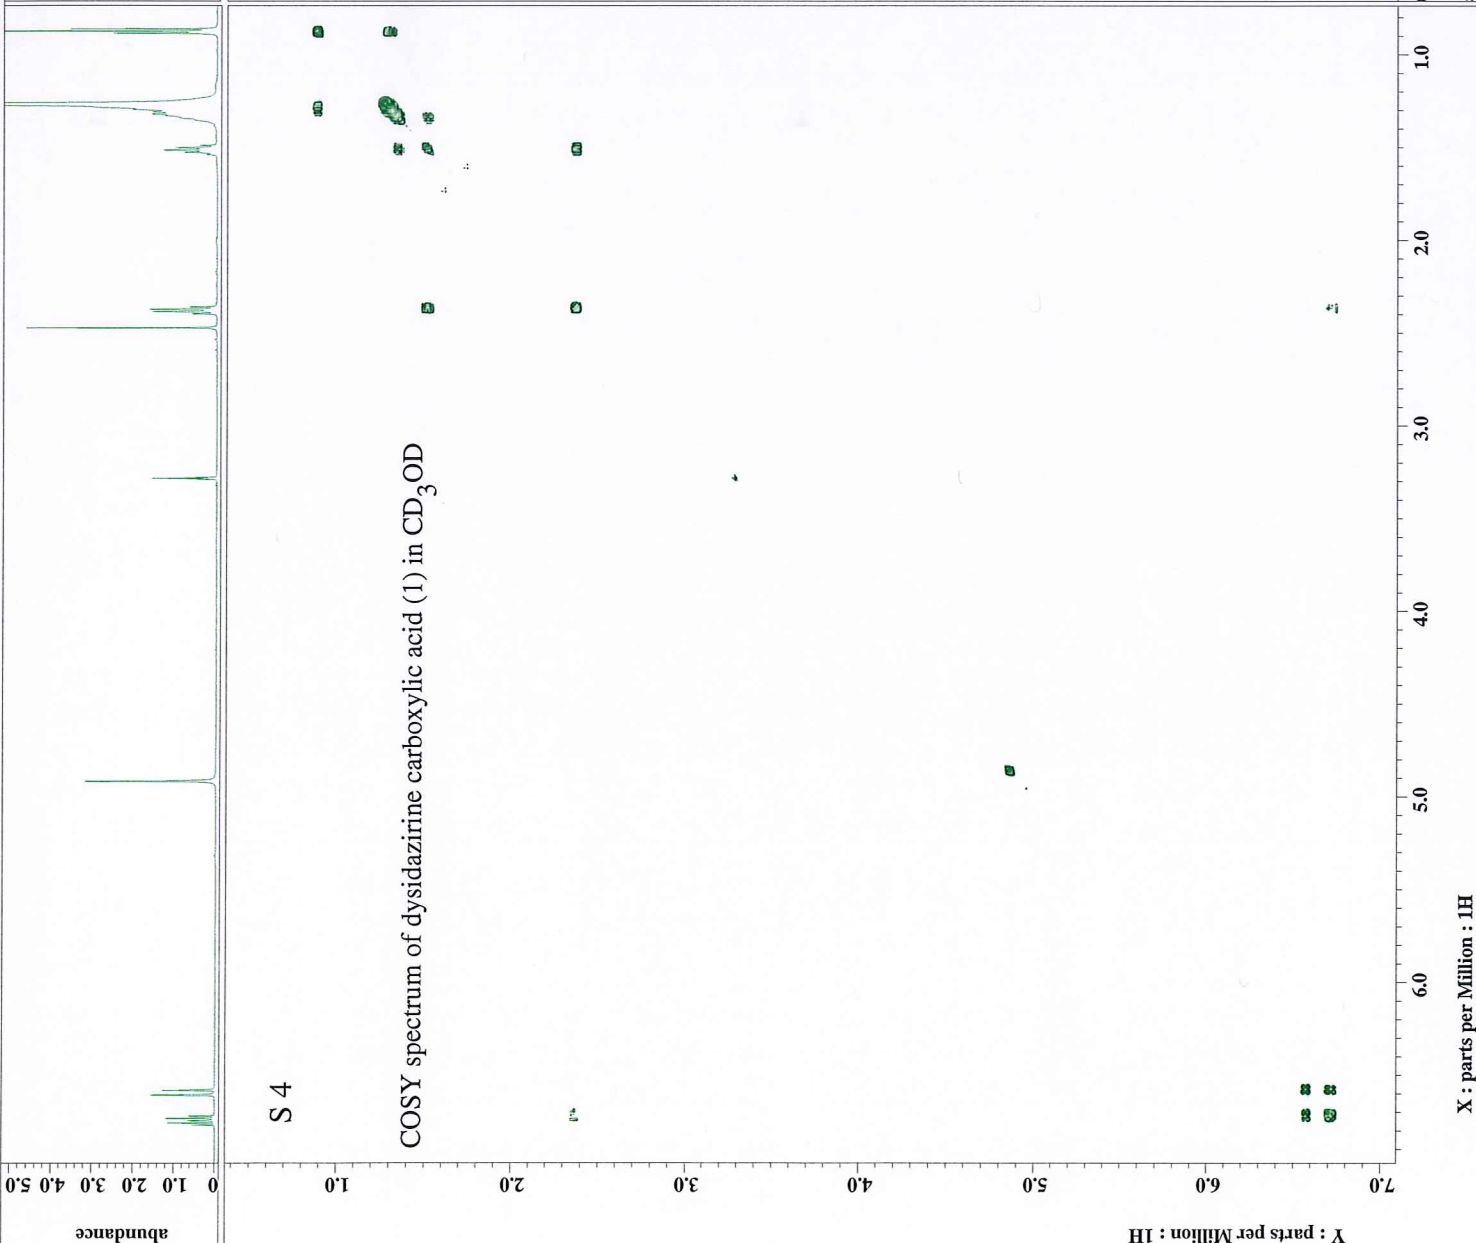

X : parts per Million : 1H

abundance

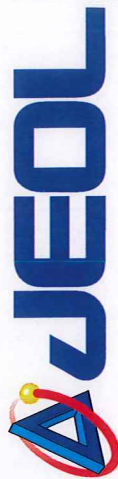

----- PROCESSING PARAMETERS -----  
dc balance : 0 : FALSE  
secp : 2.0 [Hz] : 0.0 [s]  
trapezoid3 : 0 [%] : 80 [%] : 100 [%]  
zerofill : 1  
fit : 1 : TRUE : TRUE  
machinephase  
ppm

Filename = 6sg73-9-hsqc\_edit\_dec  
Author = Smithsonian  
Experiment = hsqc edit\_dec\_ph  
Sample\_id = 6sg73-9  
Solvent = METHANOL-D3  
Creation\_time = 19-APR-2018 11:35:24  
Revision\_time = 24-AUG-2021 15:31:35  
Current\_time = 24-AUG-2021 15:38:58  
Comment = absorption\_hsqc  
Data\_format = 2D COMPLEX COMPLEX  
Dim\_size = 819, 512  
Dim\_title = 1H 13C  
Dim\_units = [ppm] [ppm]  
Dimensions = X Y  
Site = ECA 600  
Spectrometer = ECA600-AID  
Field\_strength = 14.09636928 [T] (600 [M  
X\_acq\_duration = 0.165888 [s]  
X\_domain = 1H  
X\_freq = 600.1723046 [MHz]  
X\_offset = 4.78513 [ppm]  
X\_points = 1024  
X\_prescans = 4  
X\_resolution = 6.02816358 [Hz]  
X\_sweep = 6.17283951 [kHz]  
Y\_domain = 13C  
Y\_freq = 150.91343039 [MHz]  
Y\_offset = 91.91071 [ppm]  
Y\_points = 256  
Y\_prescans = 0  
Y\_resolution = 108.86984392 [Hz]  
Y\_sweep = 27.87068004 [kHz]  
Tri\_domain = 1H  
Tri\_freq = 600.1723046 [MHz]  
Tri\_offset = 5 [ppm]  
Clipped = FALSE  
Mod\_return = 1  
Scans = 16  
Total\_scans = 4096  
X\_acq\_time = 0.165888 [s]  
X\_atn = 3 [dB]  
X\_pulse = 7.9 [us]  
Y\_acq\_time = 9.18528 [ms]  
Y\_atn = 2 [dB]  
Y\_pl\_correction = 360.0  
Y\_pulse = 14.7 [us]  
Irr\_atn\_dec = 19.1 [dB]  
Irr\_noise = MPF8  
Tri\_mode = Off  
Composite\_pulse = FALSE  
Dante\_presat = FALSE

S 5

HSQC spectrum of dysidazirine carboxylic acid (1) in CD<sub>3</sub>OD

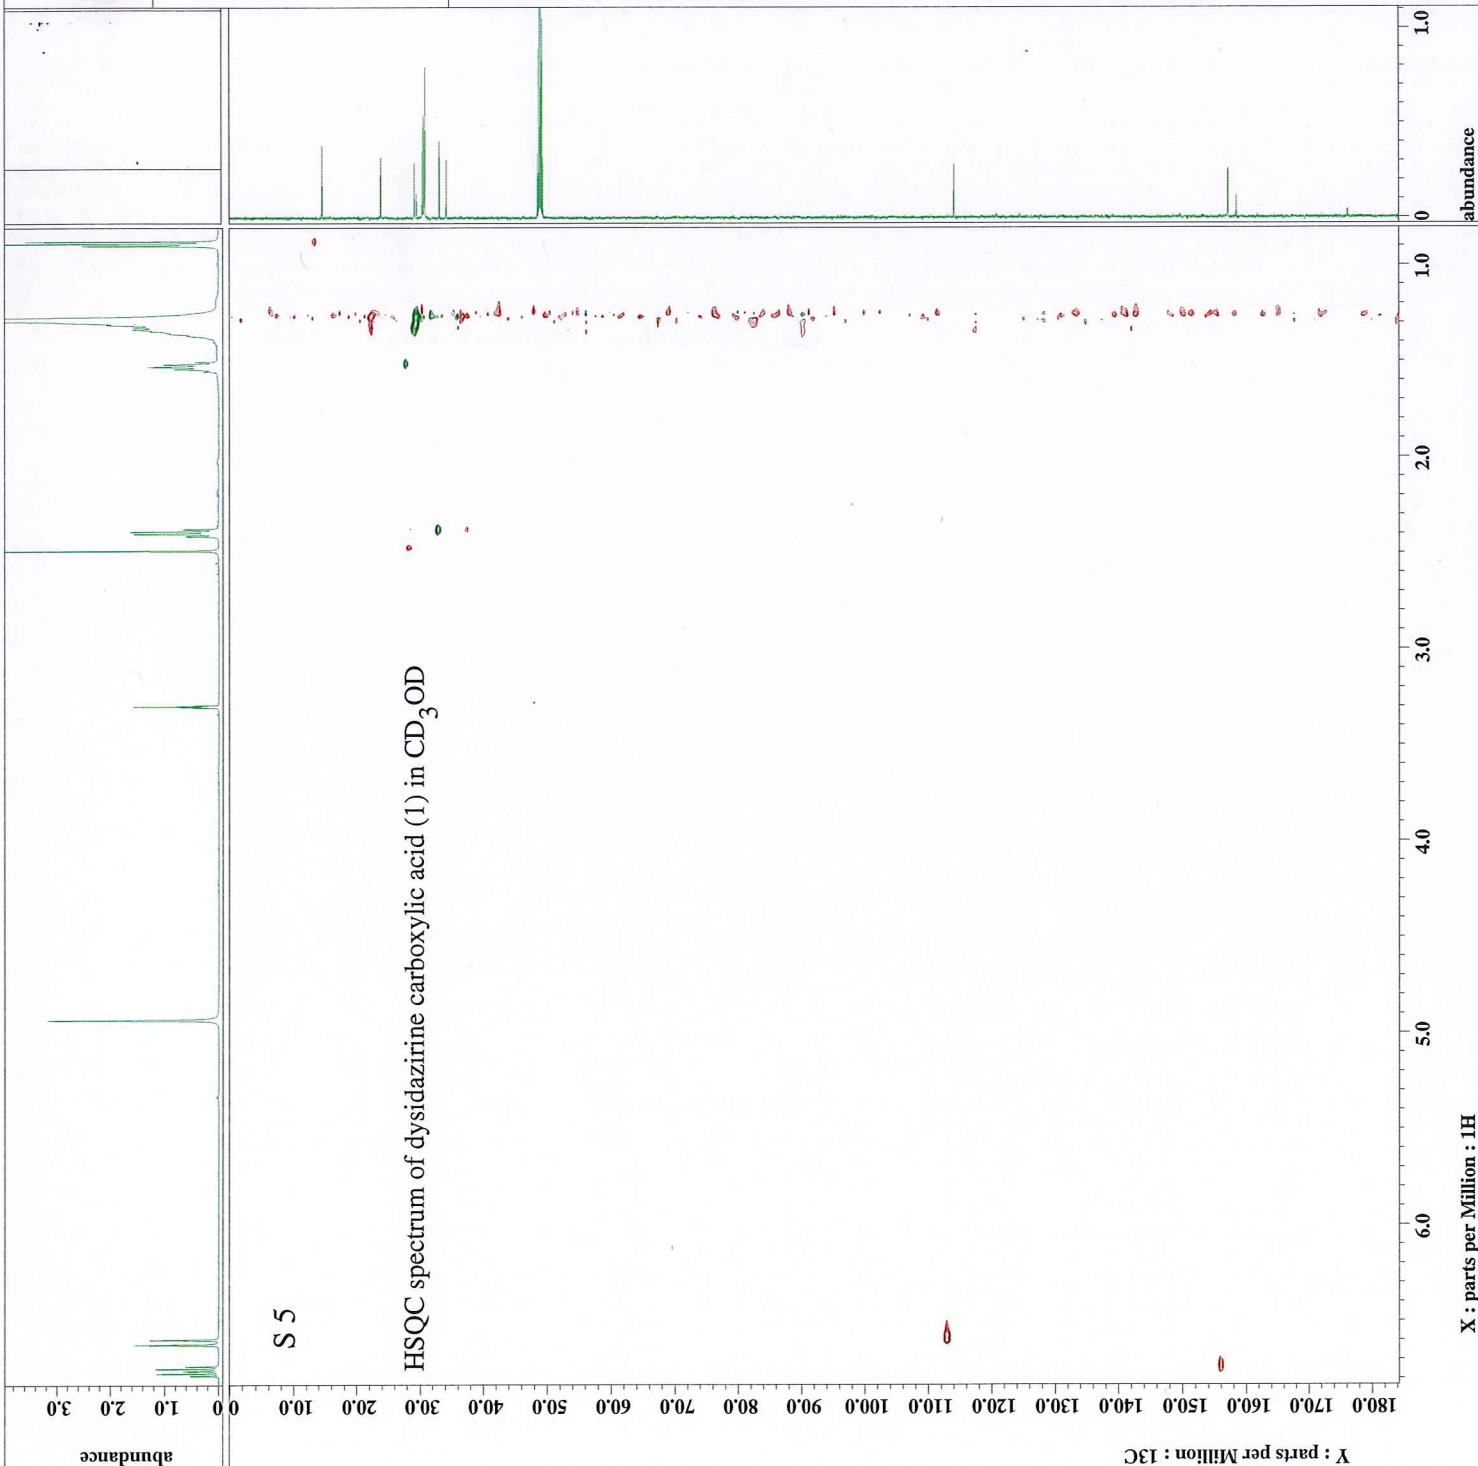

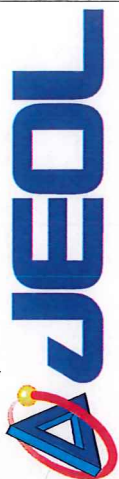

----- PROCESSING PARAMETERS -----

gauss : 5.0 [Hz] : 0.0 [s]  
sinbell : auto  
zerofill : 1  
fft : 1 : TRUE : TRUE  
ppm  
[transpose]  
sinbell4 : -60 : 160  
trapzoid3 : 5 [%] : 80 [%] : 100 [%]  
zerofill : 2 : TRUE : TRUE  
fft : 1 : TRUE : TRUE  
ppm  
abs  
[transpose]

Filename = 6sg73-9-hmbc\_pfg-3.jd  
Author = Smithsonian  
Experiment = hmbc\_pfg.ex2  
Sample\_id = 6sg73-9  
Solvent = METHANOL-D3  
Creation\_time = 19-APR-2018 15:57:11  
Revision\_time = 20-DEC-2021 10:25:17  
Current\_time = 20-DEC-2021 10:26:24  
Comment = gradient enhanced HMB  
Data\_format = 2D REAL REAL  
Dim\_size = 1638, 512  
Dim\_title = 1H 13C  
Dim\_units = [ppm] [ppm]  
Dimensions = X Y  
Site = ECA 600  
Spectrometer = ECA600-AID  
Field\_strength = 14.09636928 [T] (600 [M  
X\_acq\_duration = 0.331776 [s]  
X\_domain = 1H  
X\_freq = 600.1723046 [MHz]  
X\_offset = 4.78513 [ppm]  
X\_points = 2048  
X\_resolution = 4  
X\_sweep = 3.01408179 [Hz]  
Y\_domain = 6.17283951 [kHz]  
Y\_freq = 150.91343039 [MHz]  
Y\_offset = 91.91071 [ppm]  
Y\_points = 256  
Y\_resolution = 0  
Y\_sweep = 108.86984392 [Hz]  
Tri\_domain = 27.87088004 [kHz]  
Tri\_freq = 1H  
Tri\_offset = 600.1723046 [MHz]  
Clipped = 5 [ppm]  
Mod\_return = FALSE  
Scans = 1  
Total\_scans = 32  
X\_acq\_time = 0.331776 [s]  
X\_atn = 3 [dB]  
X\_pulse = 7.9 [us]  
Y\_acq\_time = 9.18528 [ms]  
Y\_atn = 2 [dB]  
Y\_pulse = 14.7 [us]  
Tri\_mode = Off  
Dante\_presat = FALSE  
Delta = 62.5 [ms]  
Grad\_1 = 1 [ms]  
Grad\_2 = 0.18 [T/m]  
Grad\_2\_amp = 1 [ms]

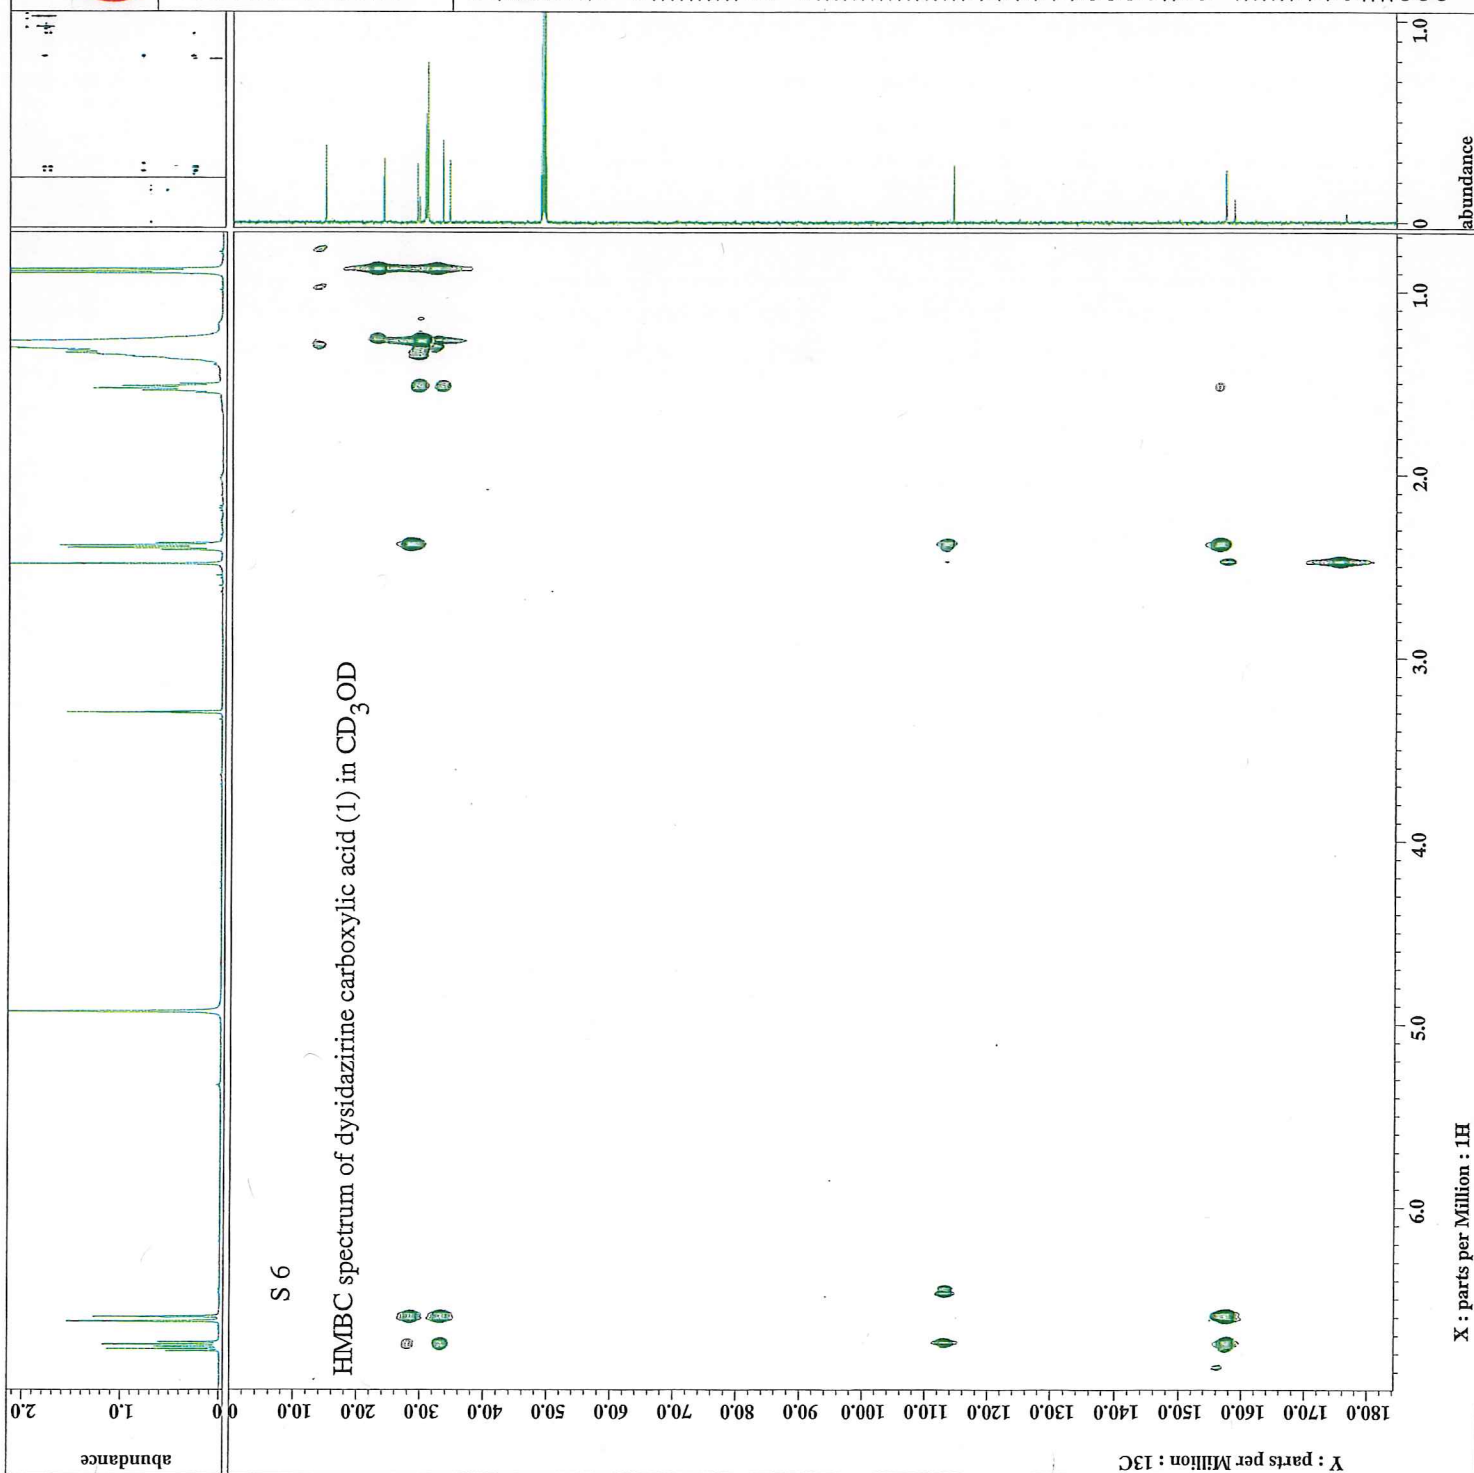

Proton spectrum of dysidazirine (2) in CDCl<sub>3</sub> and CD<sub>3</sub>OD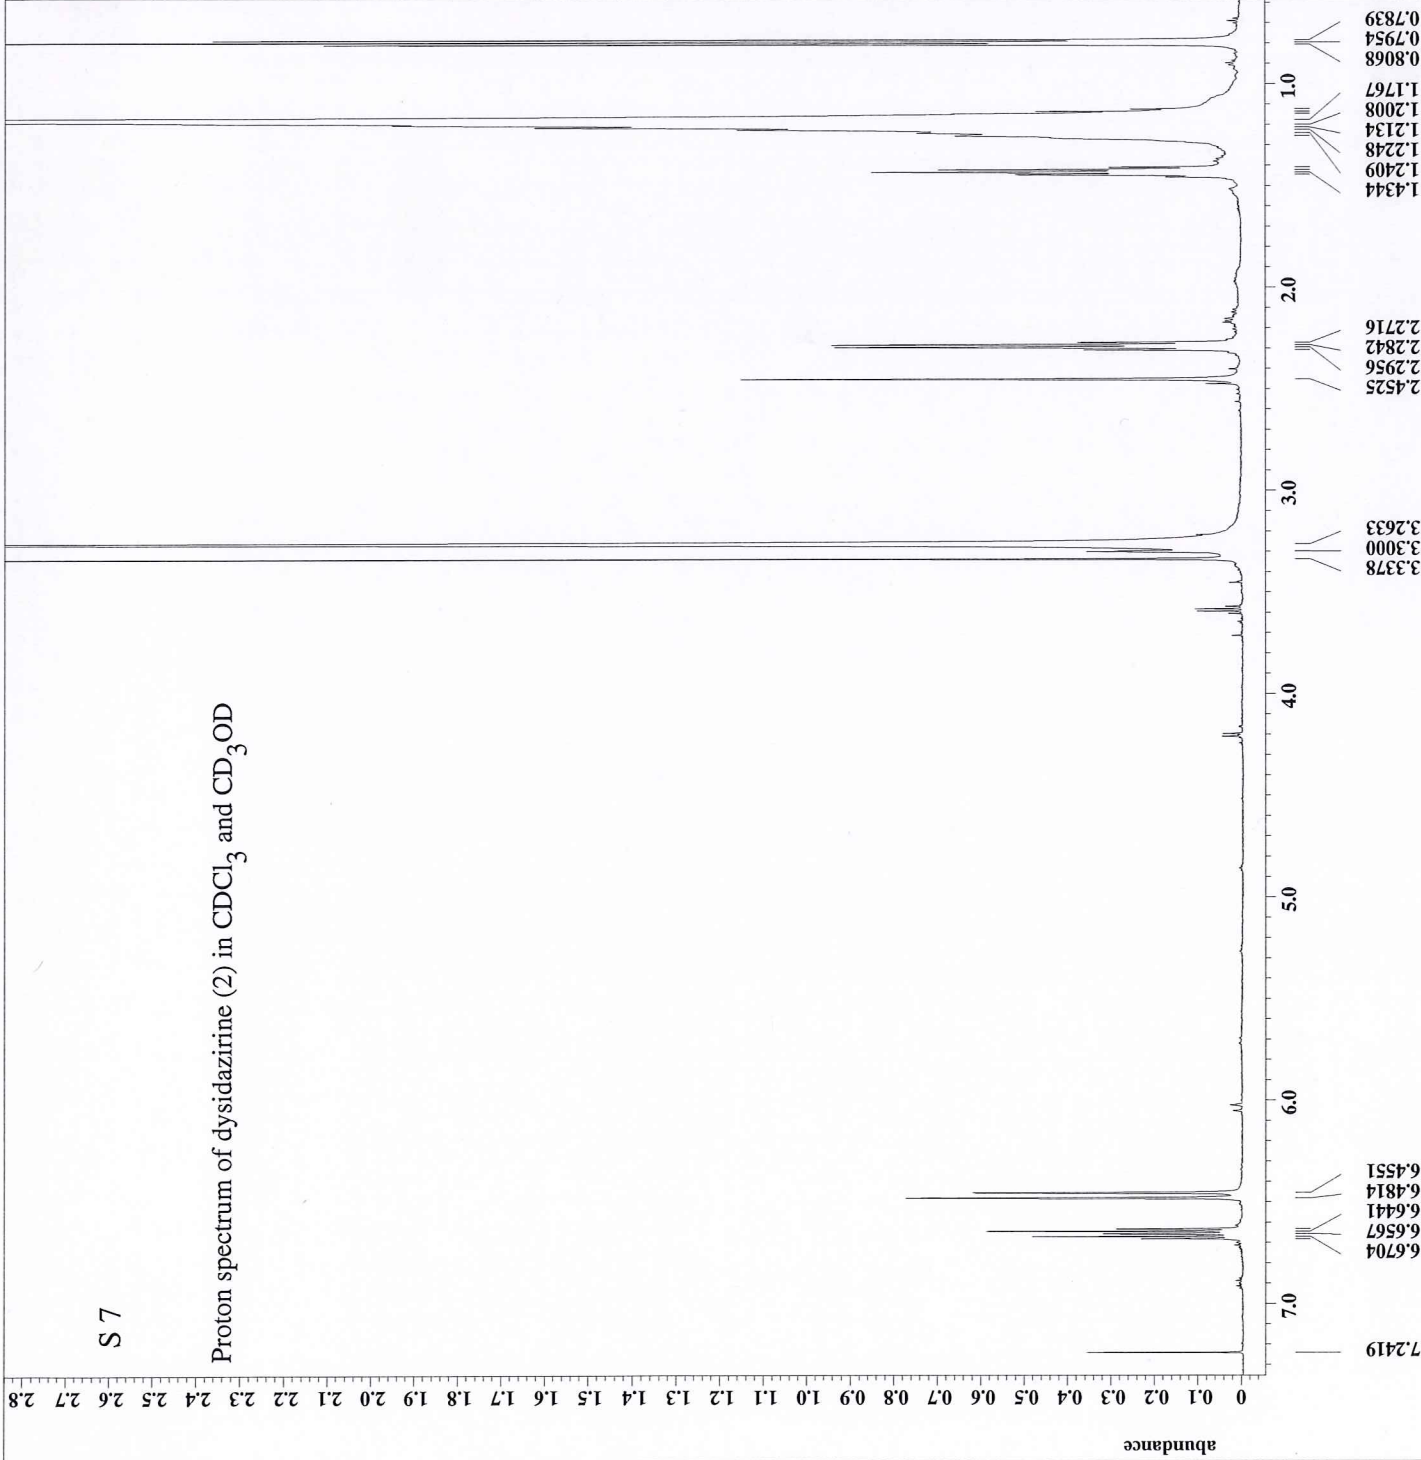

X : parts per Million : 1H

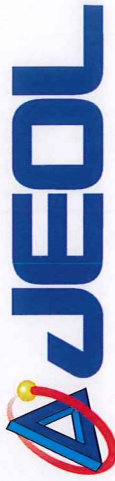

## ----- PROCESSING PARAMETERS -----

dc\_balance : 0 : FALSE  
 secp : 0.2[Hz] : 0.0[s]  
 trapezoid3 : 0[%] : 80[%] : 100[%]  
 zerofill : 1  
 fft : 1 : TRUE : TRUE  
 machinephase  
 ppm

Filename = 6sg73-11-cddcle-cd3od-  
 Author = Smithsonian  
 Experiment = single pulse.ex2  
 Sample\_id = 6sg73-11-cddcle-cd3od  
 Solvent = CHLOROFORM-D  
 Creation\_time = 23-APR-2018 07:49:23  
 Revision\_time = 27-AUG-2021 11:01:47  
 Current\_time = 27-AUG-2021 11:02:05  
 Comment = single pulse  
 Data\_format = 1D COMPLEX  
 Dim\_size = 13107  
 Dim\_title = 1H  
 Dim\_units = [ppm]  
 Dimensions = x  
 Site = ECA 600  
 Spectrometer = ECA600-AID  
 Field\_strength = 14.09636928[T] (600[M  
 X\_acq\_duration = 1.4548992[s]  
 X\_domain = 1H  
 X\_freq = 600.1723046[MHz]  
 X\_offset = 5[ppm]  
 X\_points = 16384  
 X\_prescans = 1  
 X\_resolution = 0.68733284[Hz]  
 X\_sweep = 11.26126126[kHz]  
 Irr\_domain = 1H  
 Irr\_freq = 600.1723046[MHz]  
 Irr\_offset = 5[ppm]  
 Tri\_domain = 1H  
 Tri\_freq = 600.1723046[MHz]  
 Tri\_offset = 5[ppm]  
 Clipped = FALSE  
 Mod\_return = 1  
 Scans = 8  
 Total\_scans = 8  
 X\_90\_width = 7.9[us]  
 X\_acq\_time = 1.4548992[s]  
 X\_angle = 45[deg]  
 X\_atn = 3[dB]  
 X\_pulse = 3.95[us]  
 Irr\_mode = Off  
 Tri\_mode = Off  
 Dante\_presat = FALSE  
 Initial\_wait = 1[s]  
 Recvr\_gain = 42  
 Relaxation\_delay = 5[s]  
 Repetition\_time = 6.4548992[s]  
 Temp\_get = 22[DC]

Carbon spectrum of dysidazirine (2) in CDCl<sub>3</sub>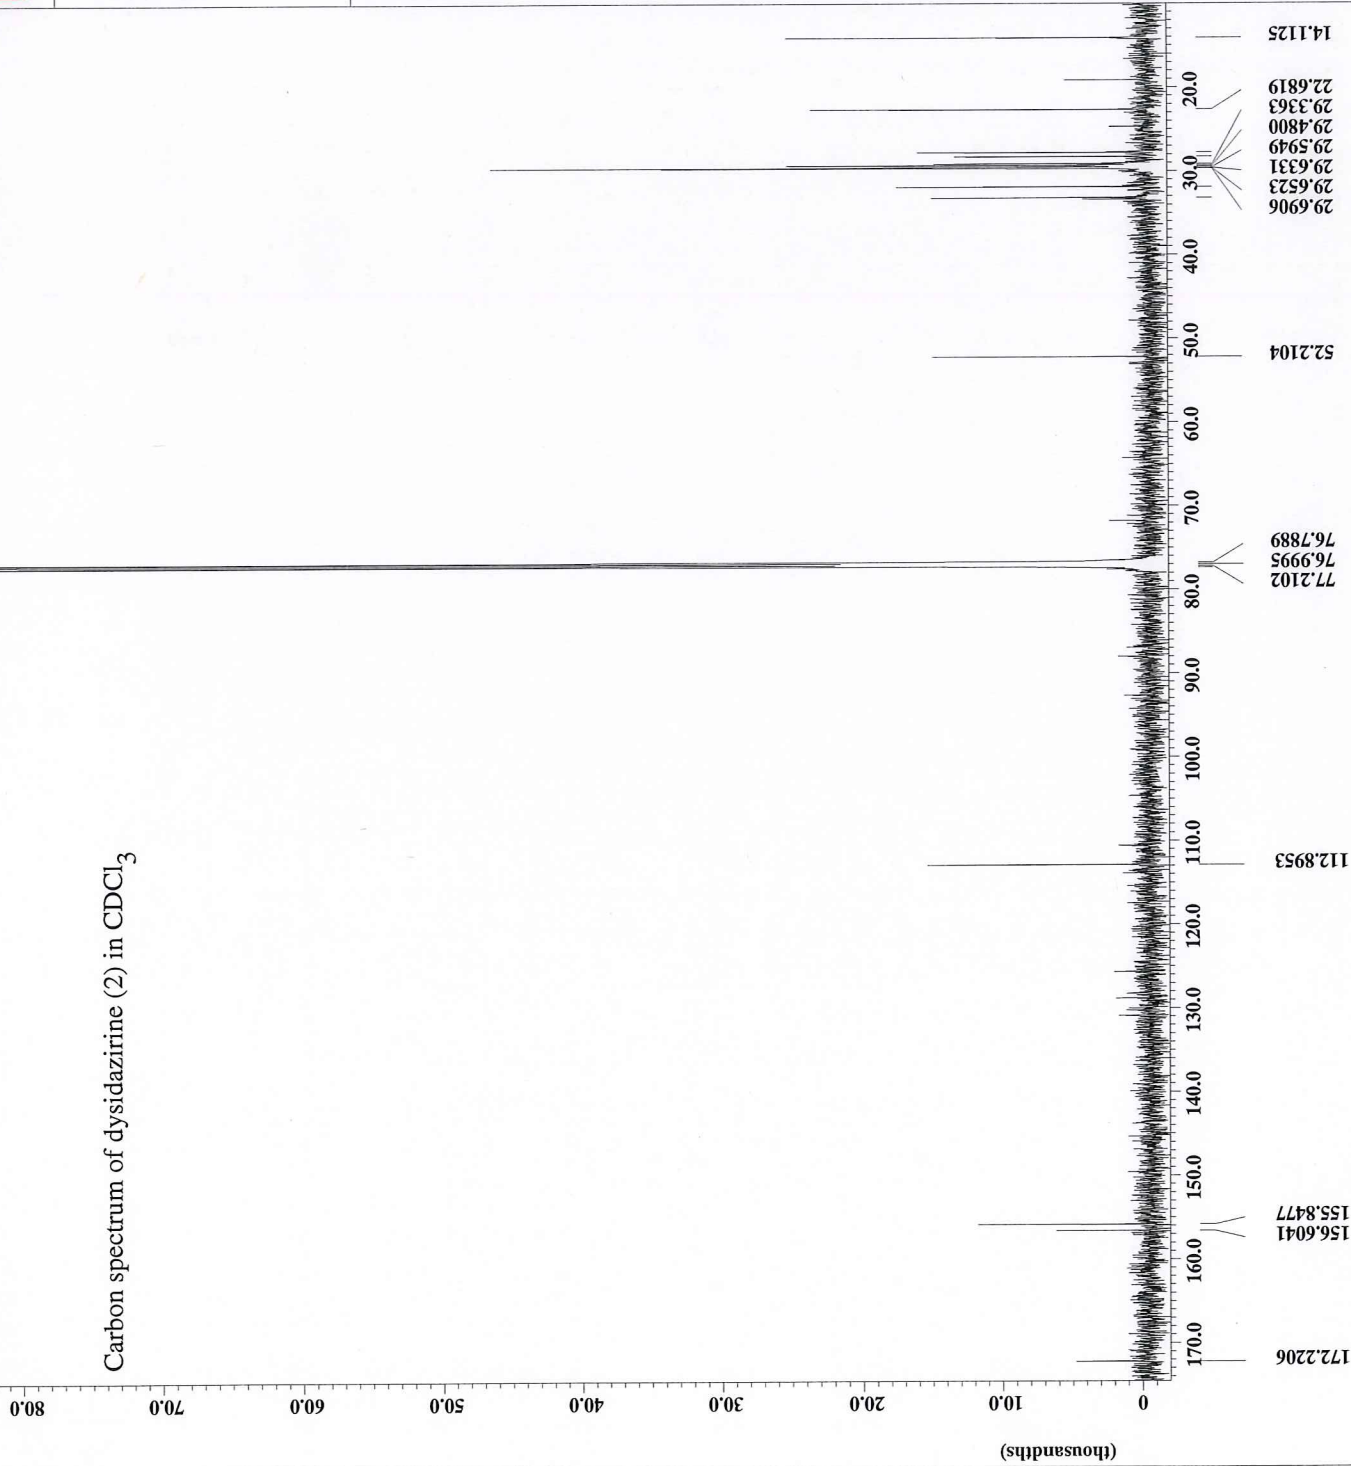

X : parts per Million : 13C

## ----- PROCESSING PARAMETERS -----

dc balance : 0 : FALSE  
secp : 2.0 [Hz] : 0.0 [s]  
trapezoid3 : 0 [%] : 80 [%] : 100 [%]  
zero fill : 1  
fit : 1 : TRUE : TRUE  
machine phase  
ppm

Filename = 6sg73-11-Me-cdcl3-sin  
Author = Smithsonian  
Experiment = single pulse dec  
Sample\_id = 6sg73-11-Me-cdcl3  
Solvent = CHLOROFORM-D  
Creation\_time = 27-APR-2018 00:07:48  
Revision\_time = 27-AUG-2021 11:13:32  
Current\_time = 27-AUG-2021 11:13:45  
Comment = single pulse decouple  
Data\_format = 1D COMPLEX  
Dim\_size = 28214  
Dim\_title = 13C  
Dim\_units = [ppm]  
Dimensions = X  
Site = ECA 600  
Spectrometer = ECA600-AID  
Field\_strength = 14.09636928 [T] (600 [M  
X\_acq\_duration = 0.69206016 [s]  
X\_domain = 13C  
X\_freq = 150.91343039 [MHz]  
X\_offset = 100 [ppm]  
X\_points = 32768  
X\_prescans = 4  
X\_resolution = 1.44496109 [Hz]  
X\_sweep = 47.34848485 [kHz]  
Irr\_domain = 1H  
Irr\_freq = 600.1723046 [MHz]  
Irr\_offset = 5 [ppm]  
Clipped = FALSE  
Mod\_return = 1  
Scans = 22000  
Total\_scans = 22000  
X\_90\_width = 14.7 [us]  
X\_acq\_time = 0.69206016 [s]  
X\_angle = 30 [deg]  
X\_atn = 2 [dB]  
X\_pulse = 4.9 [us]  
Irr\_atn\_dec = 22.6 [dB]  
Irr\_atn\_noe = 22.6 [dB]  
Irr\_noise = WALTZ  
Decoupling = TRUE  
Initial\_wait = 1 [s]  
Noe\_time = TRUE  
Noe\_gain = 60  
Relaxation\_delay = 2 [s]  
Repetition\_time = 2.69206016 [s]  
Temp\_get = 22.4 [deg]

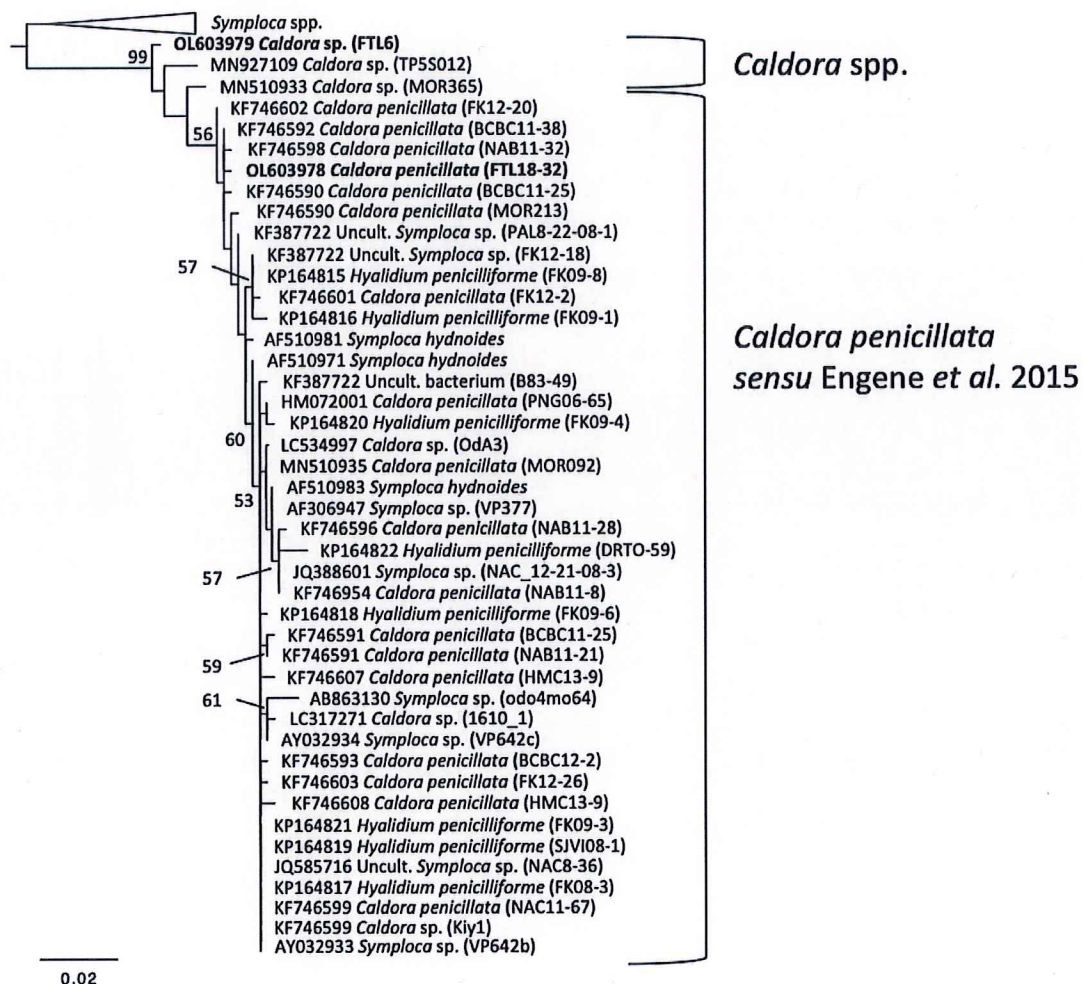

**Supplemental Figure S9.** Fully developed 16S rDNA maximum likelihood tree showing *Caldora penicillata* sequences summarized as a triangle in Figure 2. Note variation of sequences taxonomy found on Genbank corresponding to older names applied to this species prior to formal description of the genus and epithet combination by Engene et al. 2015. FTL18-32 was collected at the same Ft. Lauderdale location and represents the more widespread *Caldora penicillata*.
